# Supplementary material for: Multi-Omic Analysis in a Metabolic Syndrome Porcine Model Implicates Arachidonic Acid Metabolism Disorder as a Risk Factor for Atherosclerosis
Source: Frontiers journal article supplement (doi:10.3389/fnut.2022.807118), 2022-02-23

A

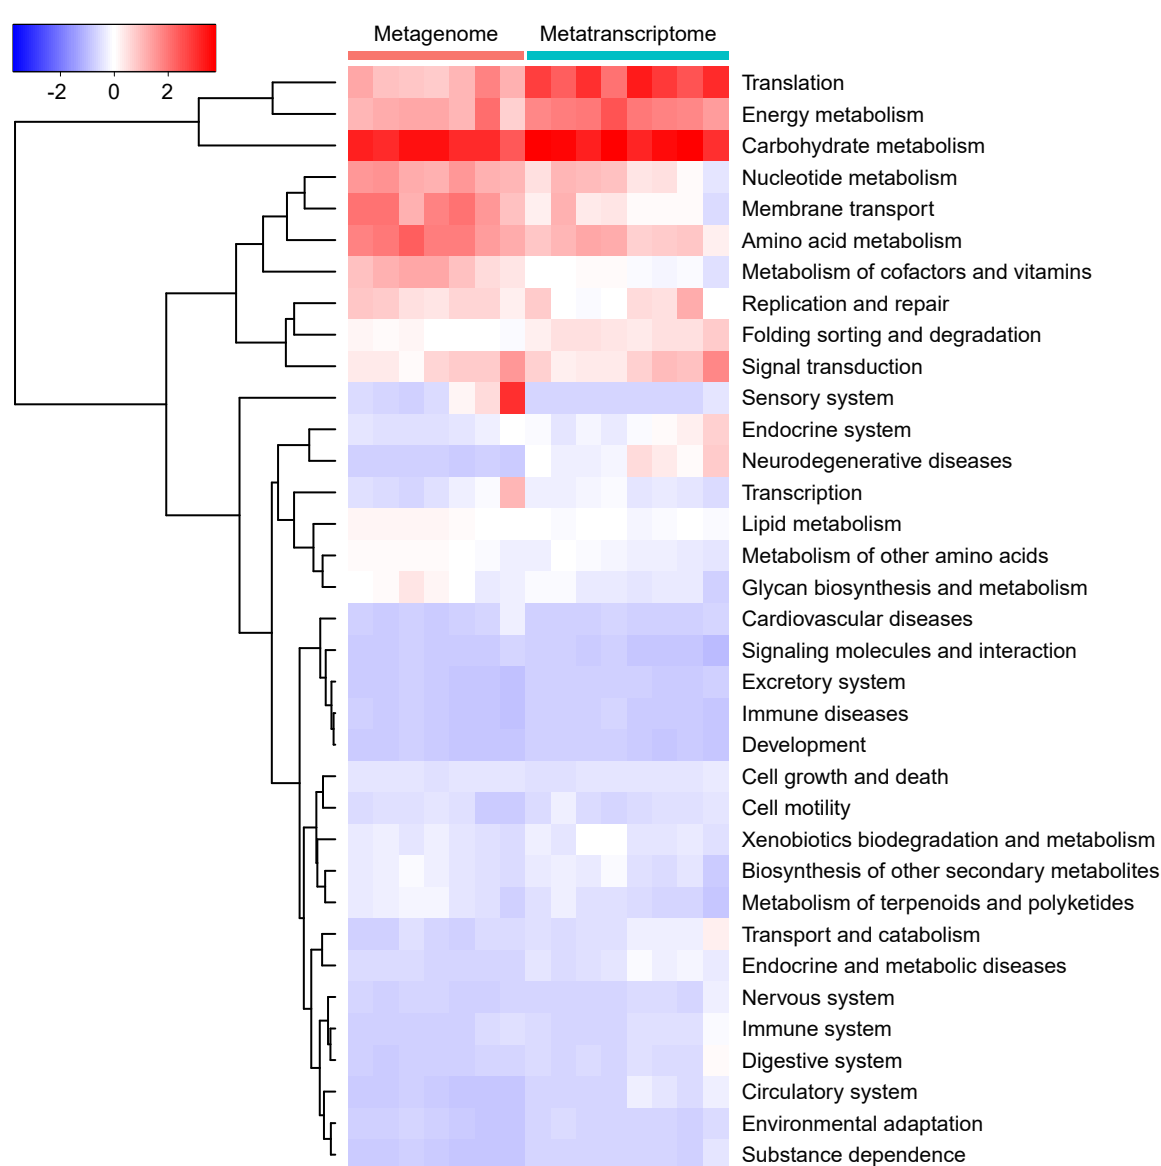

B

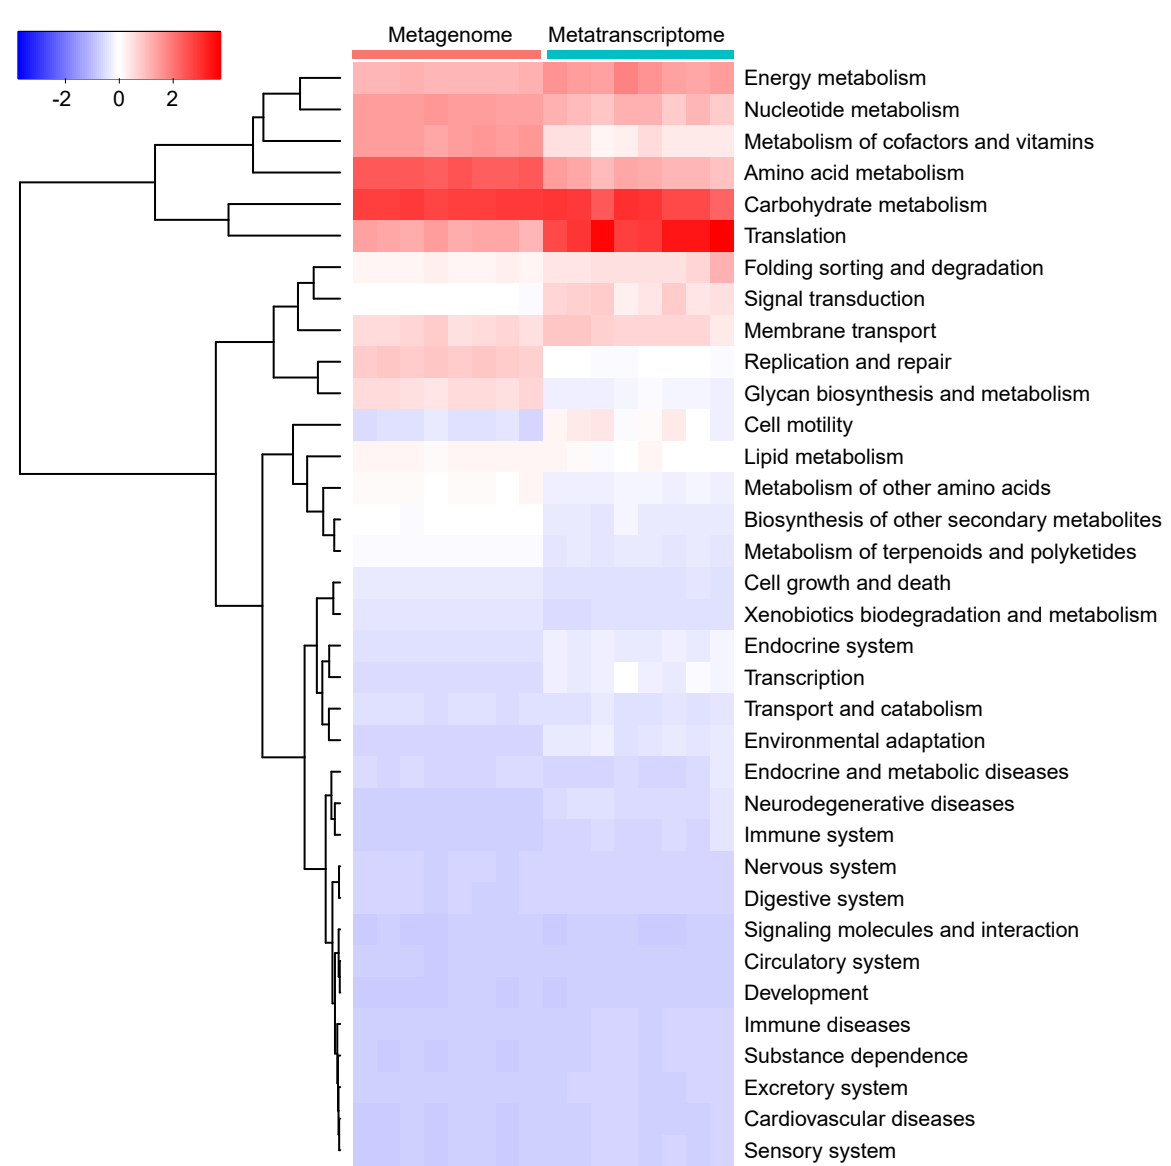

C

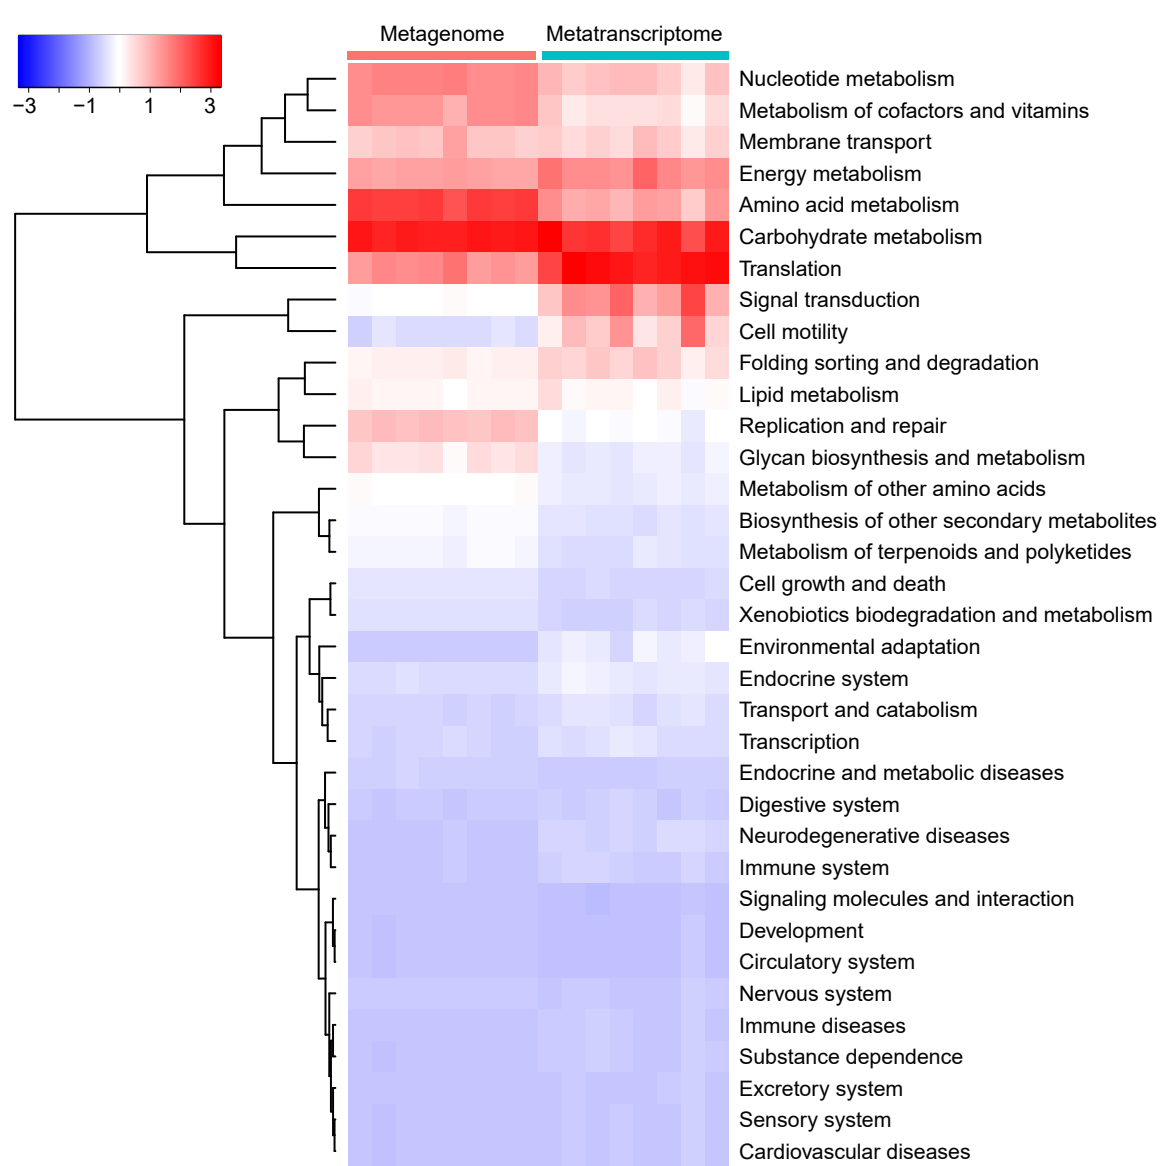

D

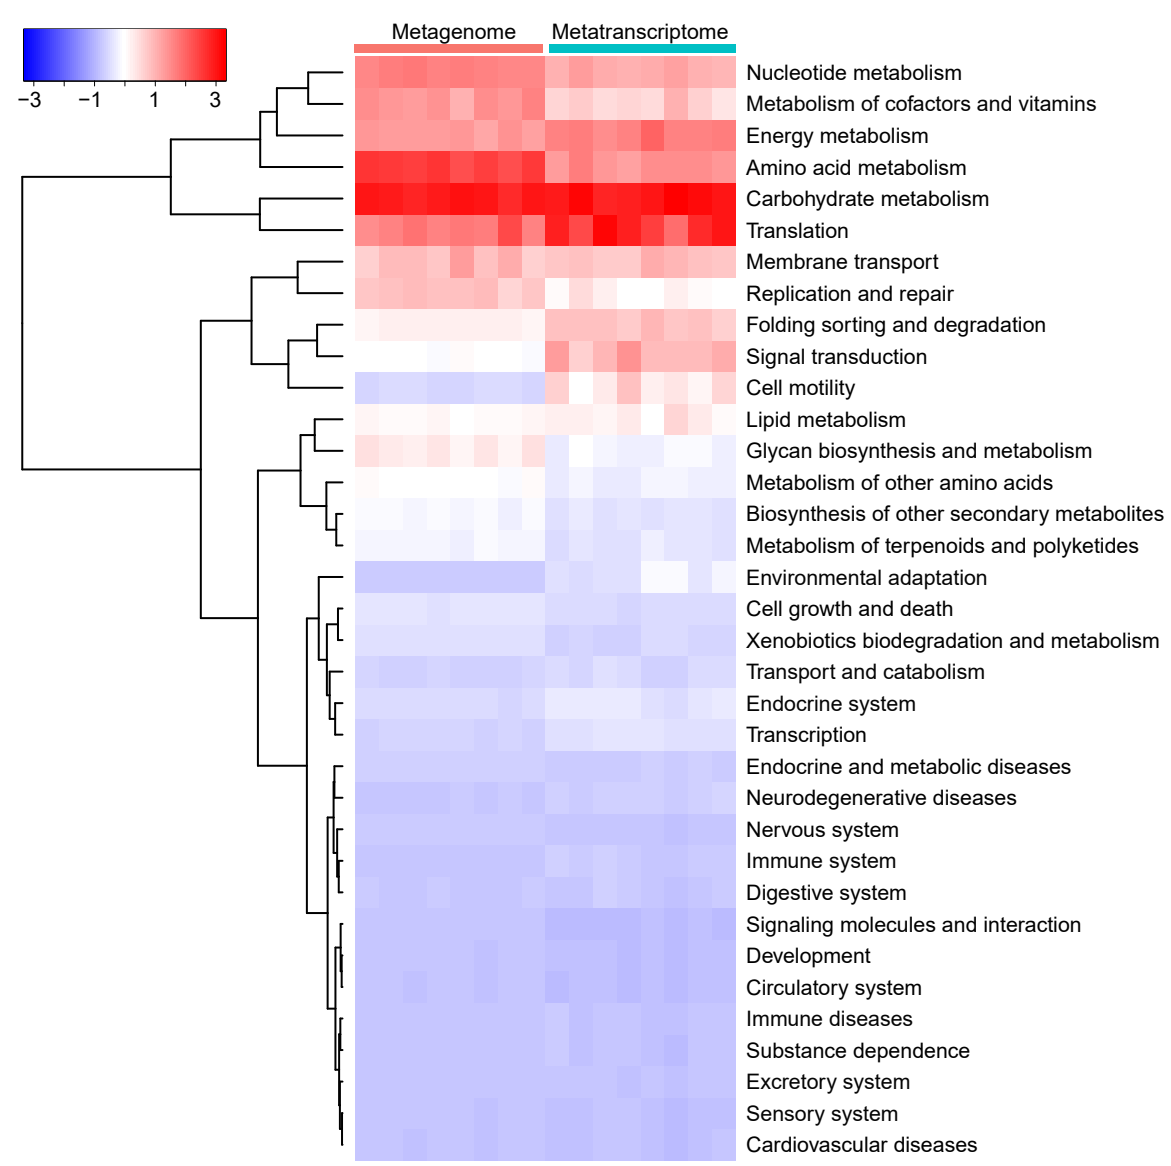

Supplement: Data_Sheet_5.PDF [file Data_Sheet_5.PDF]
